# Supplementary material for: Antigen experience history directs distinct functional states of CD8+ CAR T cells during the anti-leukemia response
Source: PubMed Central journal article supplement (PMC10775394; doi:10.21203/rs.3.rs-3712137/v1), 2023-12-21
Supplement: NIHPPrs3712137v1-supplement-1.pdf [file NIHPPrs3712137v1-supplement-1.pdf]

Figure S1

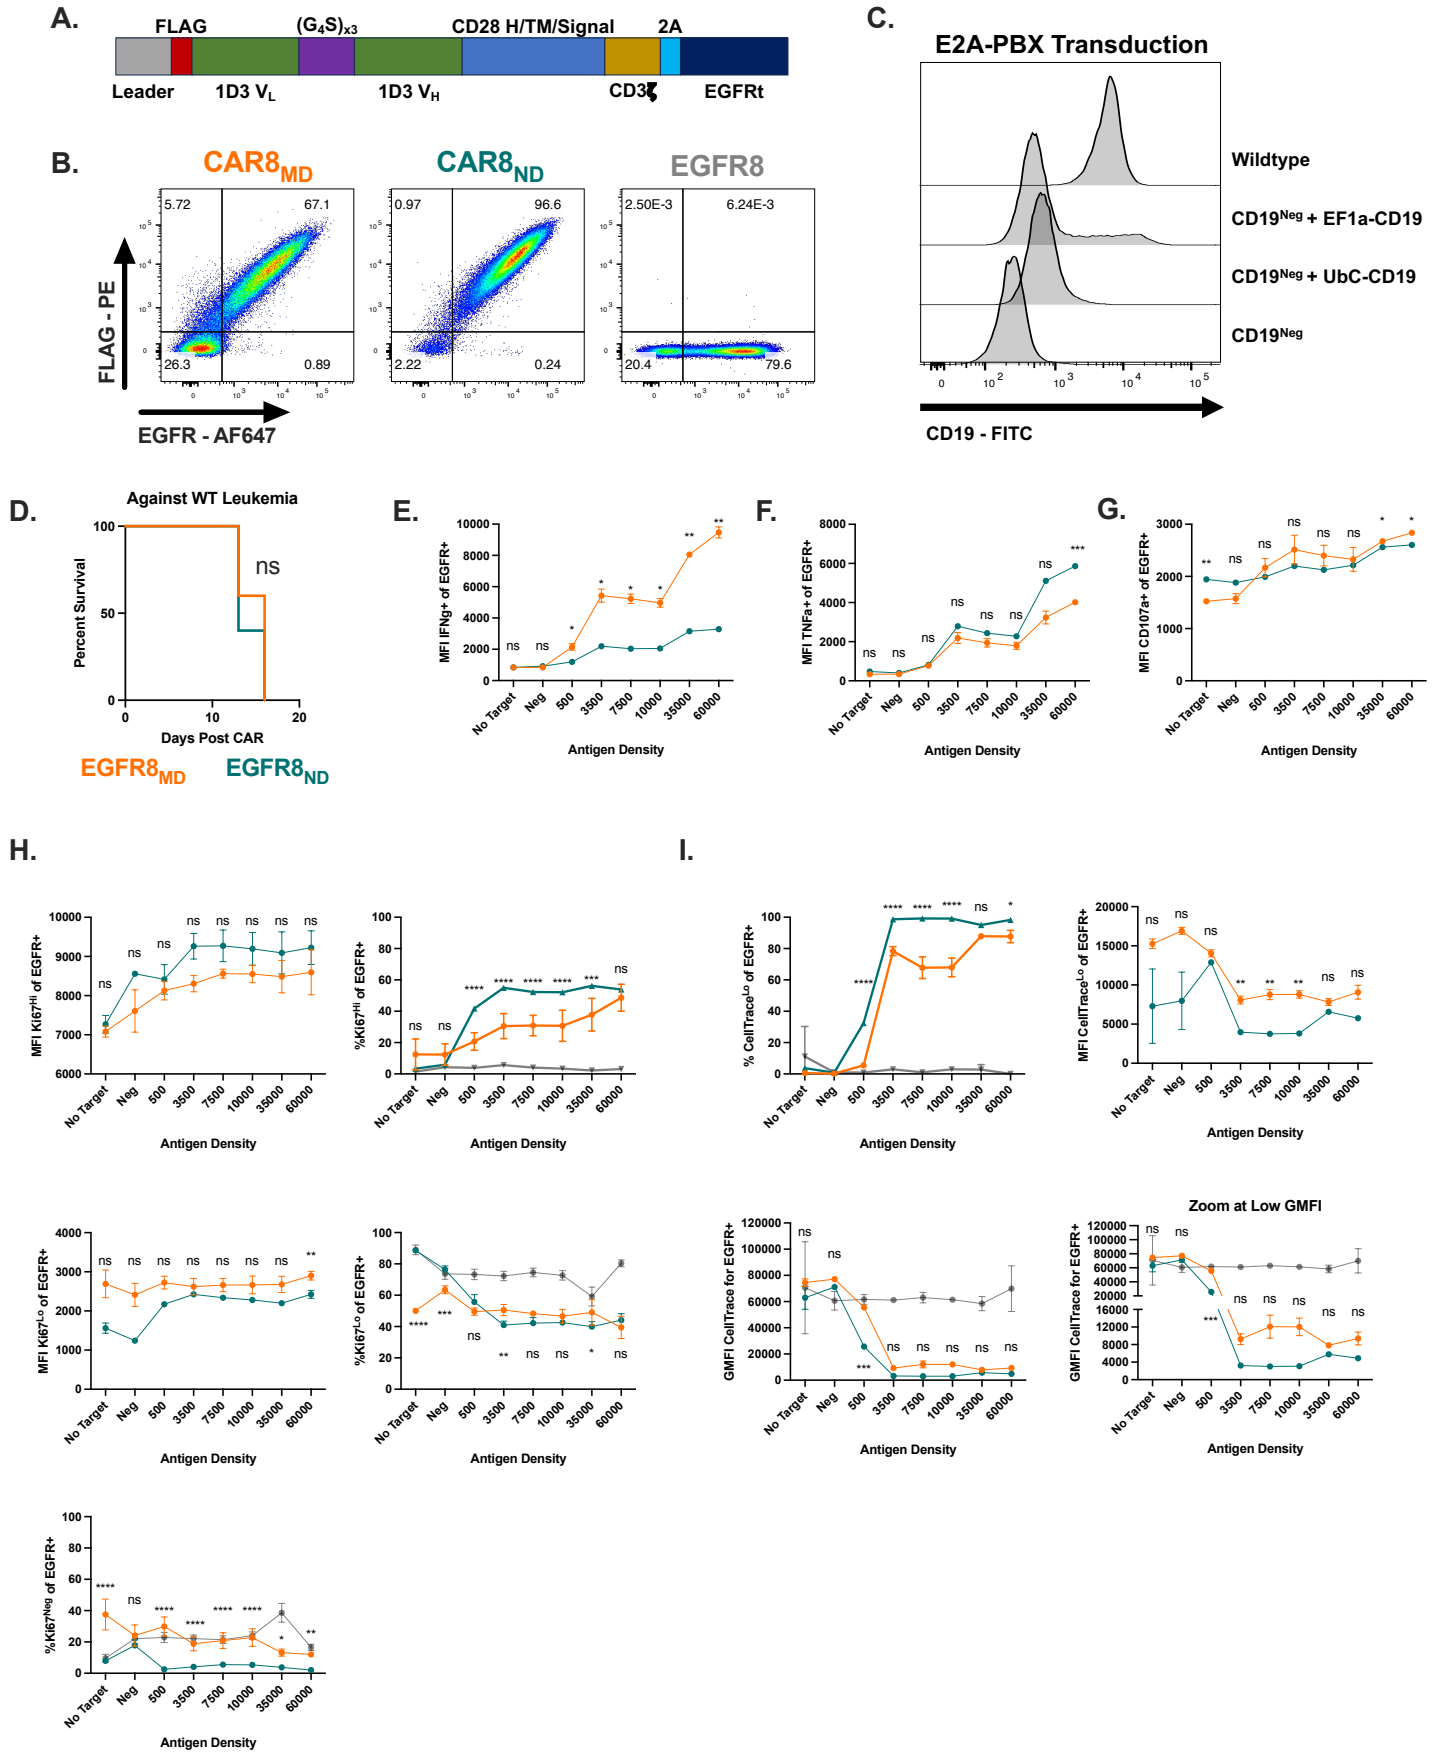

1 **Figure S1: E2A-PBX/mCD19 antigen density model and murine anti-CD19 CAR T cells, and additional**  
2 **statistical comparisons of *in vitro* data (Related to Figure 1)**

3 **S1A:** Schematic of the anti-mouse CD19 CAR contained in pMSCV backbone. **S1B:** Coexpression of CAR and  
4 EGFR on murine CAR T cells. **S1C:** Engineering of murine leukemia with lentiviral vectors containing hUbC or  
5 hEF1a promoters driving the CD19 transgene. **S1D:** Survival of mice after treatment with 1e6 EGFR+ (EGFR8,  
6 non-CAR expressing) naïve or memory-derived CD8+ T cells. Data is from 1 experiment, total n=5 mice per  
7 group. **S1E:** Mean fluorescence intensity of IFN $\gamma$ + cell population. **S1F:** Mean fluorescence intensity of TNF $\alpha$ +  
8 cell population. **S1G:** Mean fluorescence intensity of CD107a+ population. **S1H:** Statistical comparisons of  
9 Ki67<sup>Neg</sup> (% Ki67Neg of EGFR+), Ki67<sup>Lo</sup> (%Ki67<sup>Lo</sup> of EGFR+, MFI Ki67<sup>Lo</sup> of EGFR+) and Ki67<sup>Hi</sup> (%Ki67<sup>Hi</sup> of EGFR+,  
10 MFI Ki67<sup>Hi</sup> of EGFR+) populations . **S1I:** Statistical comparisons of CellTrace<sup>Lo</sup> (% CellTrace<sup>Lo</sup> of EGFR+, MFI  
11 CellTrace<sup>Lo</sup> of EGFR+) and total EGFR+ (GFMI CellTrace, GFMI CellTrace with zoomed axis) populations. Data  
12 represent mean +/- SD. \* p<0.05, \*\* p<0.01, \*\*\* p<0.001, \*\*\*\* p<0.0001.

13  
14  
15  
16  
17  
18  
19  
20  
21  
22  
23  
24  
25  
26  
27  
28  
29  
30  
31  
32  
33  
34  
35  
36  
37  
38

Figure S2

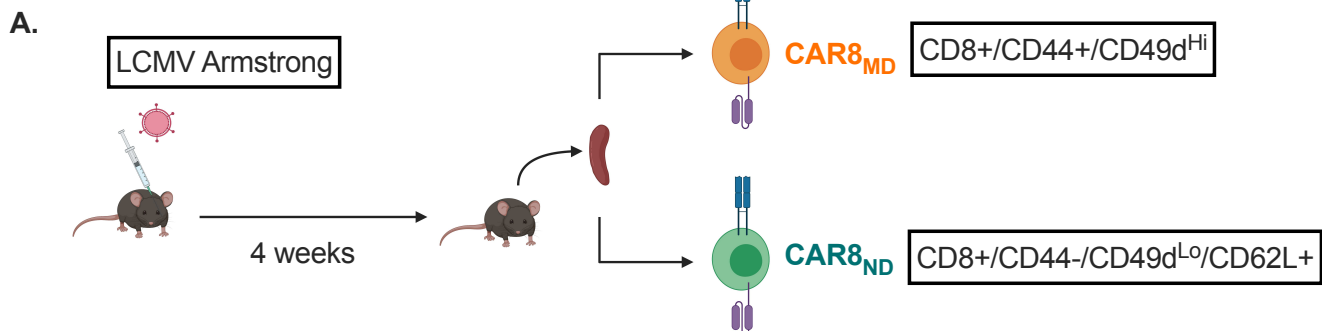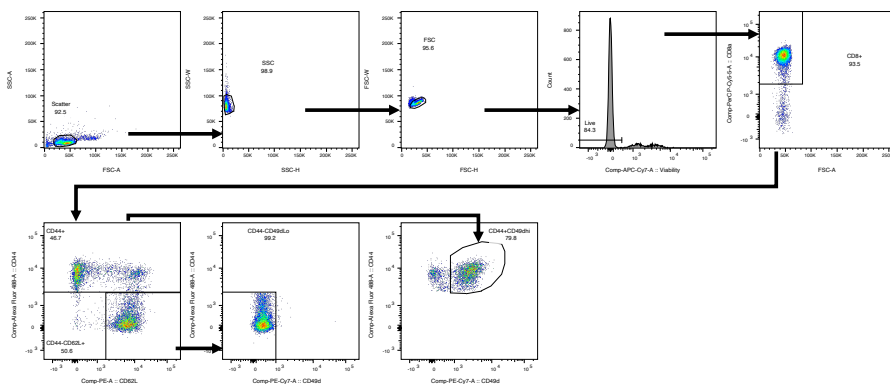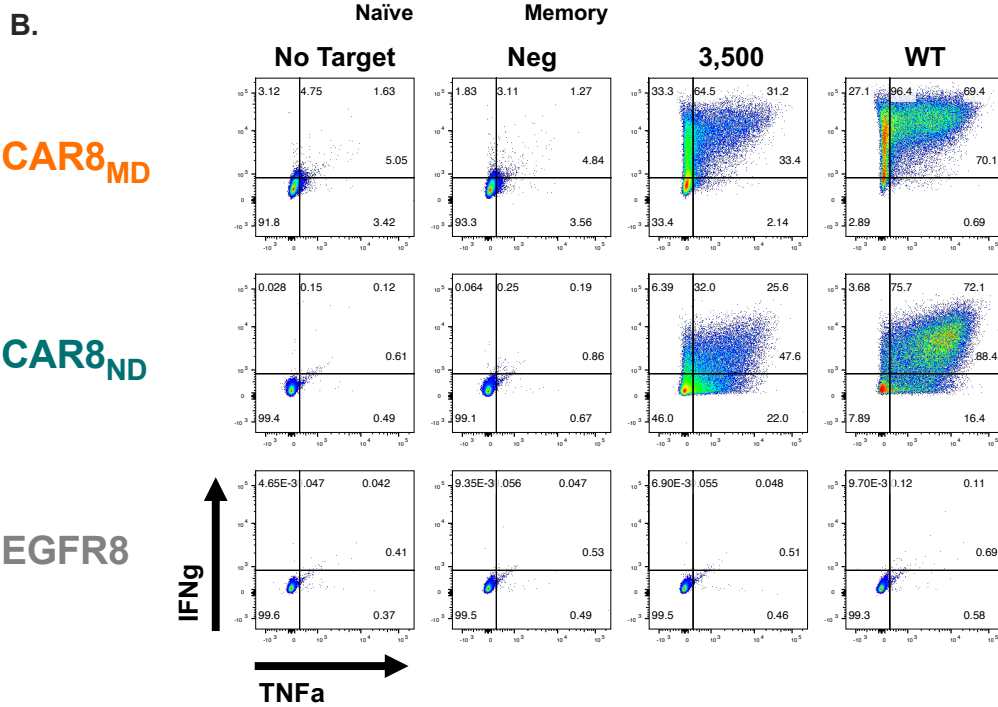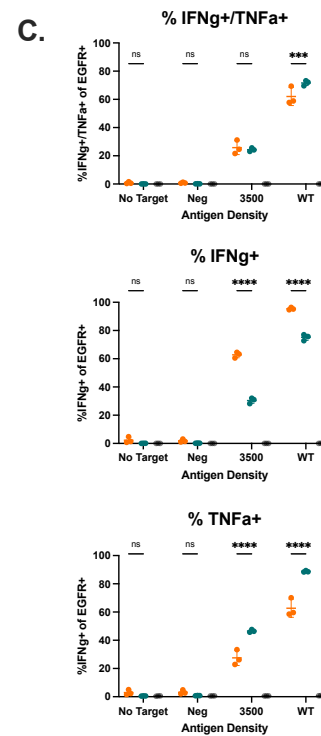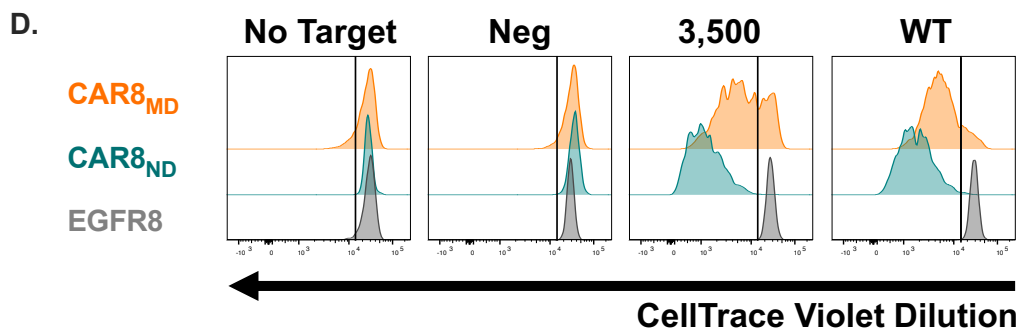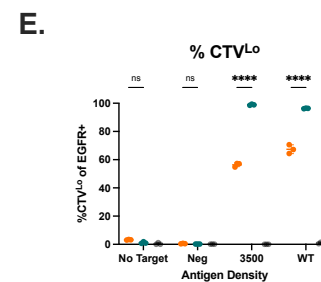

1 **Figure S2: Polyclonal pathogen-elicited CAR8<sub>MD</sub> function similarly to vaccine-elicited CAR8<sub>MD</sub> (Related**  
2 **to Figure 1).**

3 **S3A:** Schematic: LCMV model for generating memory CD8<sup>+</sup> T cells. C57BL/6 hosts were infected with LCMV-  
4 Armstrong. 4 weeks later, naïve and memory CD8<sup>+</sup> T cells were sorted from the same hosts using the indicated  
5 FACS markers and used to manufacture CAR8<sub>MD</sub>, memory-derived or CAR8<sub>ND</sub>, naïve-derived or EGFR8 control  
6 cells. **S3B:** Intracellular cytokine staining of IFN $\gamma$  and TNF $\alpha$  after 6 hour co-culture assay. **S3C:** Quantifications  
7 of proportions of IFN $\gamma$ <sup>+</sup> and TNF $\alpha$ <sup>+</sup> cells of EGFR<sup>+</sup> population. **S3D:** Proliferation as measured by dilution of  
8 CellTrace Violet dye after 72 hour co-culture assay. **S3E:** Quantification of CellTrace assay, proportions of  
9 CellTrace<sup>Lo</sup> cells. All assays were performed with n=3 technical replicates, and are representative of 2  
10 independent experiments. Data represent mean +/- SD. \* p<0.05, \*\* p<0.01, \*\*\* p<0.001, \*\*\*\* p<0.0001.

11  
12  
13

Figure S3

1e6 CAR+ Cell Dose

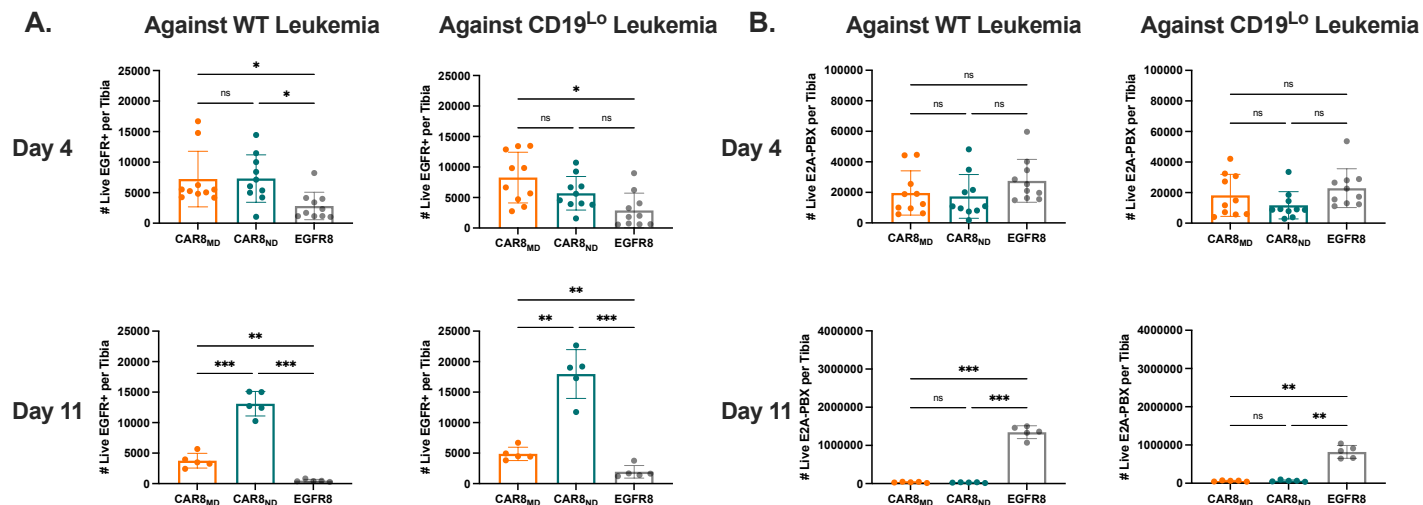

3e5 CAR+ Cell Dose

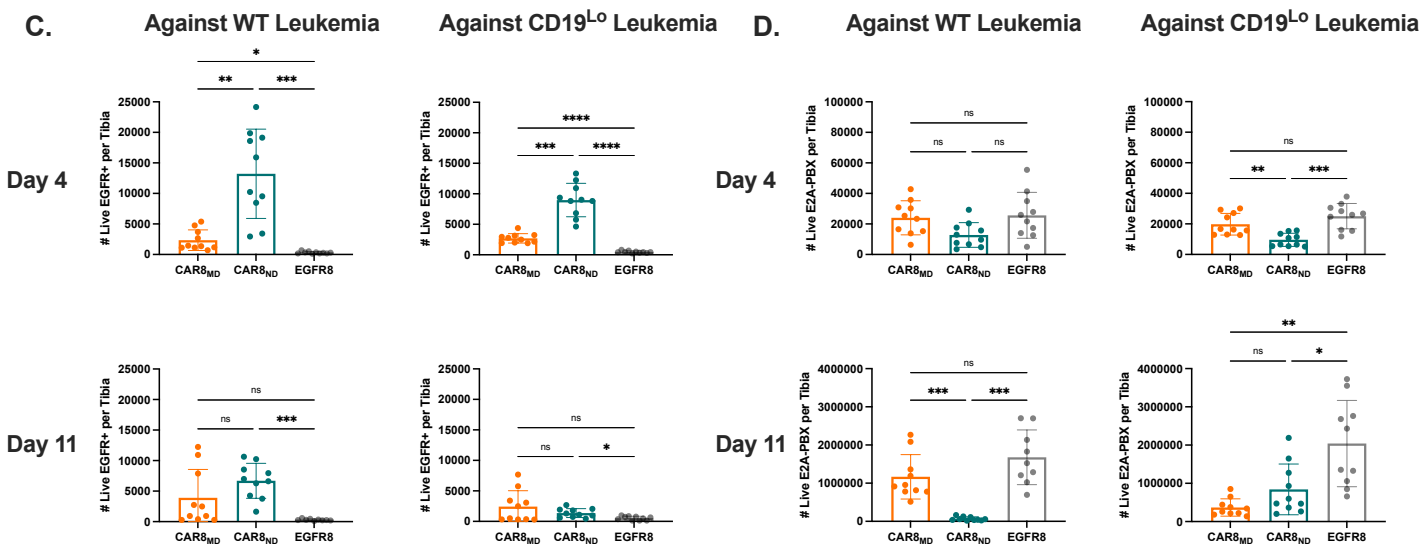

Figure S3: CAR T cells and leukemia counts per tibia for *in vivo* data (Related to Figures 2 & 3)

All analyses in this figure are done on the same experiments described in Figures 2 and 3. Counts data was generated by flushing a single tibia and using total tibia counts and cytometer proportions data to calculate CAR and leukemia cell counts per tibia. **S8A**: CAR counts for 1e6 CAR dose experiments. **S8B**: Leukemia counts for 1e6 CAR dose experiments. **S8C**: CAR counts for 3e5 CAR dose experiments. **S8D**: Leukemia counts for 3e5 CAR dose experiments. Data are from 2 pooled, independent experiments with n=10 mice per condition, apart from the 1e6 CAR dose day 11 timepoint, which contains data from one experiment with n=5 mice per condition. Data represent mean +/- SD. \* p<0.05, \*\* p<0.01, \*\*\* p<0.001, \*\*\*\* p<0.0001.

**Figure S4**

**A.**

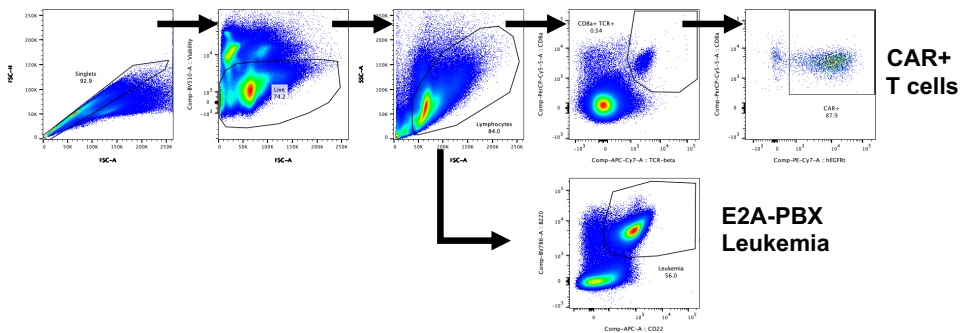

**B.**

**Against WT Leukemia**

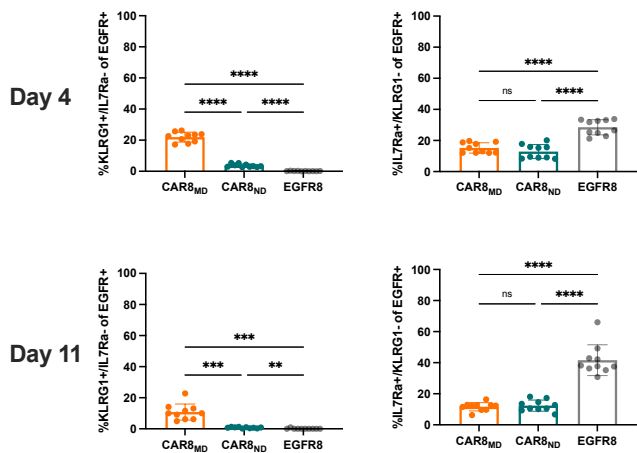

**C.**

**Against CD19<sup>Lo</sup> Leukemia**

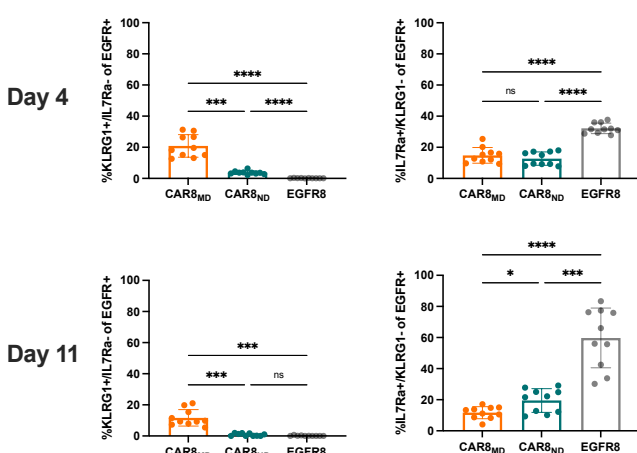

**D.**

**Against WT Leukemia**

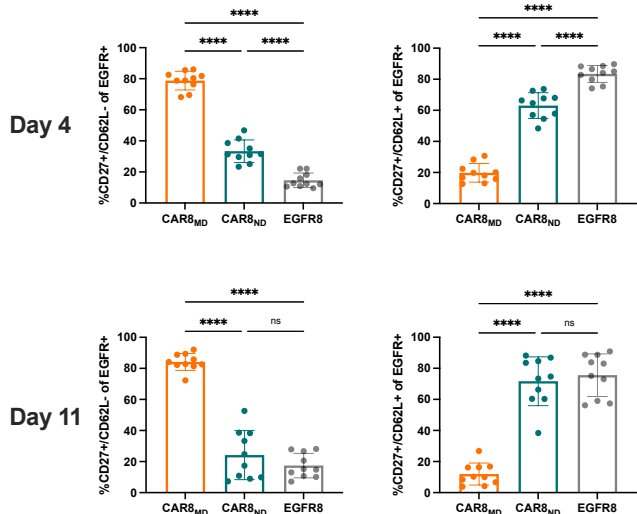

**E.**

**Against CD19<sup>Lo</sup> Leukemia**

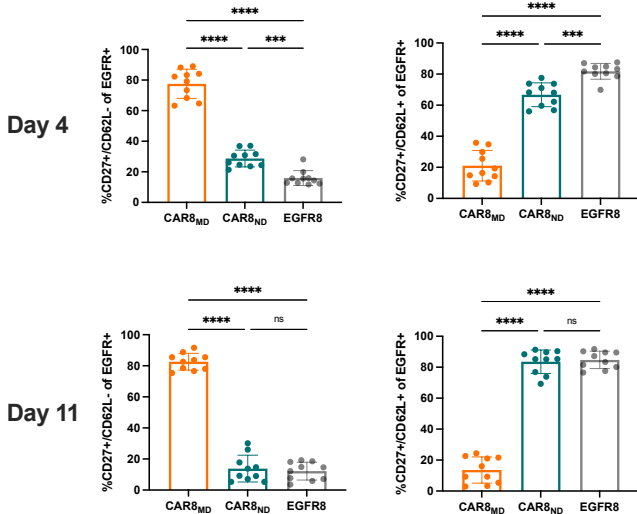

1  
2  
3  
4  
5

1 **Figure S4: Basic characterization of *in vivo* model and additional *in vivo* effector/memory phenotyping**  
2 **at high CAR dose (Related to Figure 2).**

3 **S4A:** Basic flow cytometry gating strategy for *in vivo* experiments. Total events were gated by Singlets, Live Cells  
4 and then Lymphocytes, followed by CD8a+/TCRbeta+/EGFR+ cells for CAR8/EGFR8 or B220+/CD22+ cells for  
5 E2A-PBX. S4C-F are from experiments with the 1e6 EGFR+ cell dose. **S4B:** Proportions of CAR8 with the short-  
6 lived effector cell (SLEC, IL7Ra-/KLRG1+) or memory precursor effector cell (MPEC, IL7Ra+/KLRG1-)  
7 phenotypes at the indicated timepoint against WT leukemia. **S4C:** Proportions of CAR8 with the short-lived  
8 effector cell (SLEC, IL7Ra-/KLRG1+) or memory precursor effector cell (MPEC, IL7Ra+/KLRG1-) phenotypes at  
9 the indicated timepoint against CD19<sup>L0</sup> leukemia. **S4D:** Proportions of CAR8 with the effector memory precursor  
10 (EMP, CD27+/CD62L-) or central memory precursor (CMP, CD27+/CD62L+) phenotypes at the indicated  
11 timepoint against WT leukemia. **S4E:** Proportions of CAR8 with the effector memory precursor (EMP,  
12 CD27+/CD62L-) or central memory precursor (CMP, CD27+/CD62L+) phenotypes at the indicated timepoint  
13 against CD19<sup>L0</sup> leukemia. Data in S4C-F are from 2 pooled, independent experiments with n=10 mice per  
14 condition. Data represent mean +/- SD. \* p<0.05, \*\* p<0.01, \*\*\* p<0.001, \*\*\*\* p<0.0001.

**Figure S5**

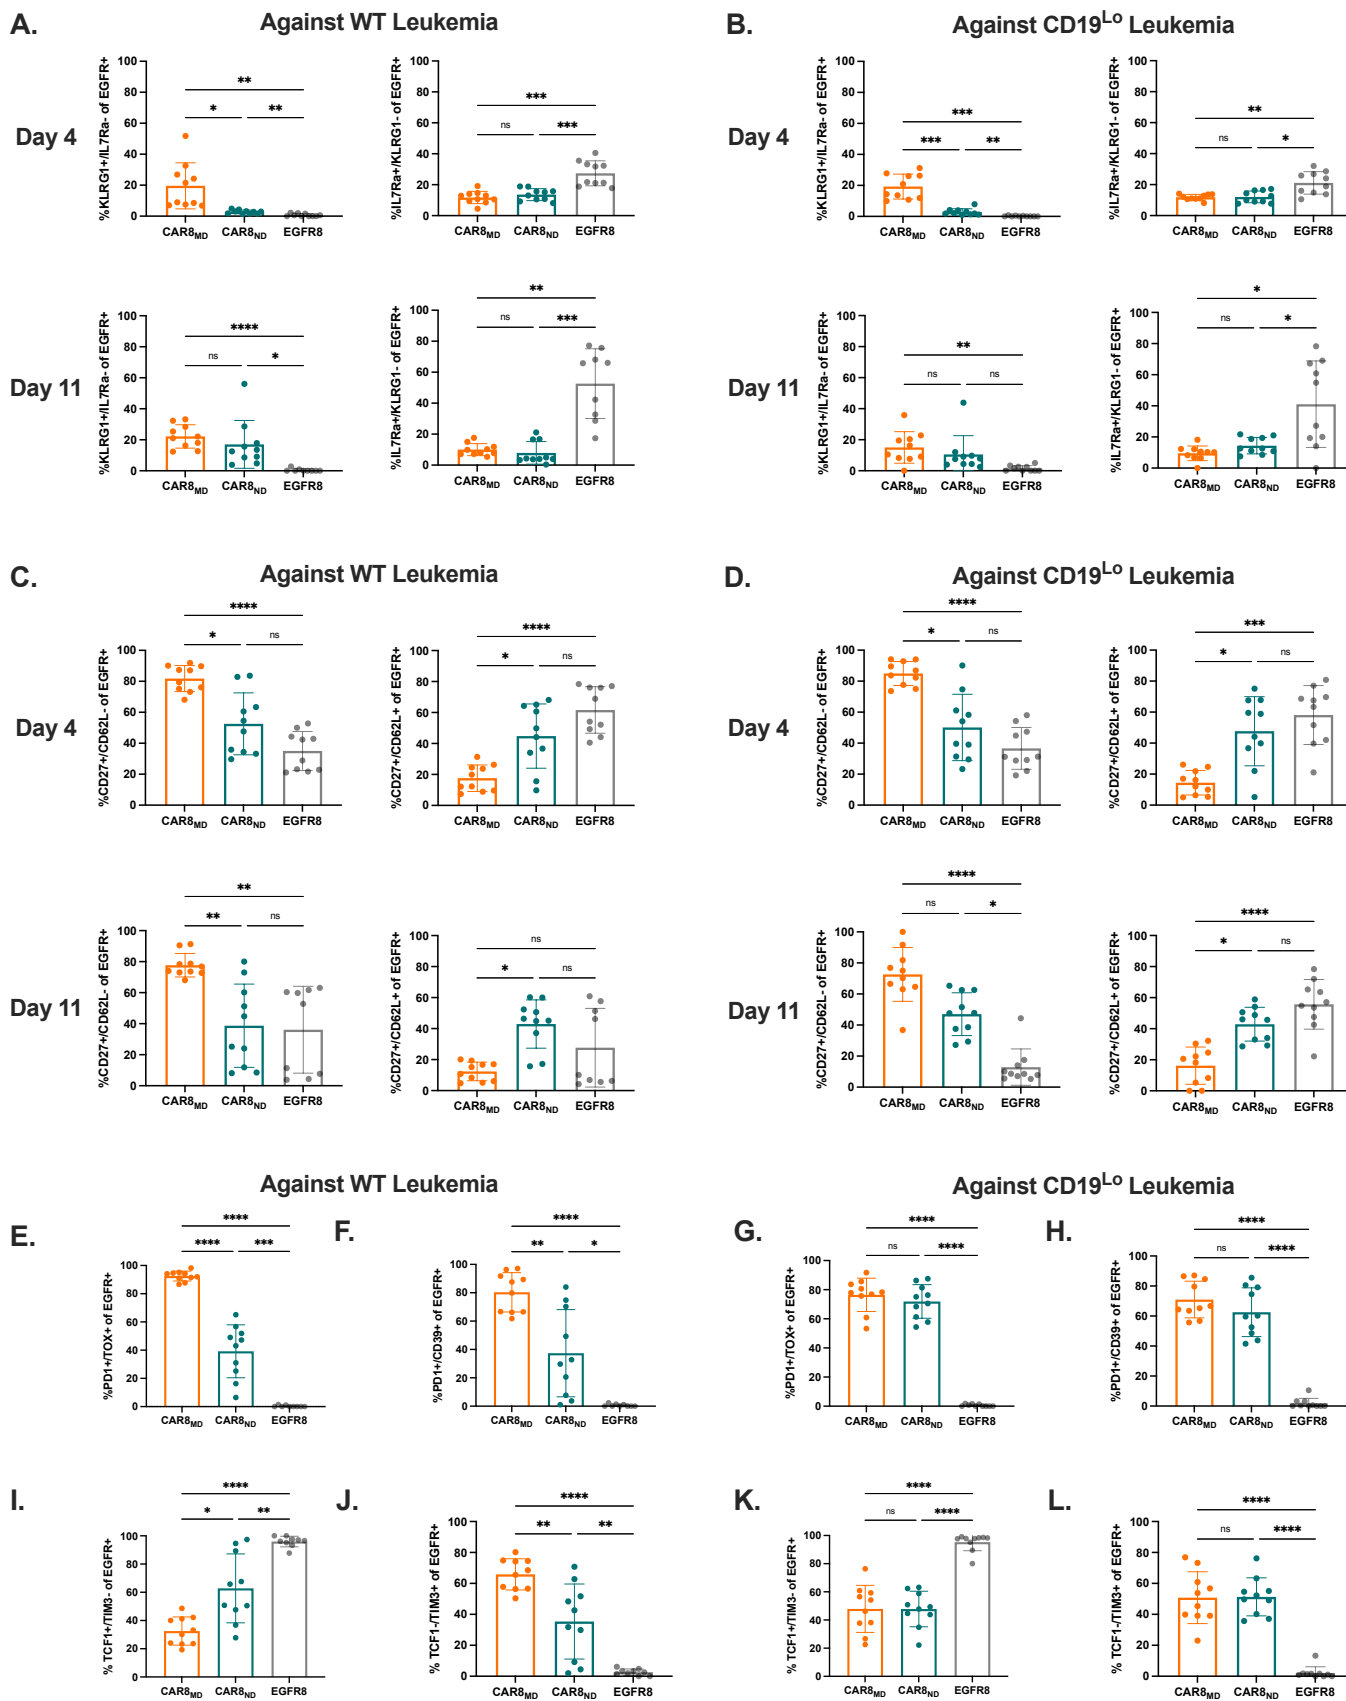



1 **Figure S5: Additional *in vivo* effector/memory and exhaustion phenotyping at low CAR dose (Related to**  
2 **Figure 3).**

3 All data in this figure are from experiments with the 3e5 EGFR+ cell dose. **S5A:** Proportions of CAR8 with the  
4 short-lived effector cell (SLEC, IL7Ra-/KLRG1+) or memory precursor effector cell (MPEC, IL7Ra+/KLRG1-)  
5 phenotypes at the indicated timepoint against WT leukemia. **S5B:** Proportions of CAR8 with the short-lived  
6 effector cell (SLEC, IL7Ra-/KLRG1+) or memory precursor effector cell (MPEC, IL7Ra+/KLRG1-) phenotypes at  
7 the indicated timepoint against CD19<sup>L0</sup> leukemia. **S5C:** Proportions of CAR8 with the effector memory precursor  
8 (EMP, CD27+/CD62L-) or central memory precursor (CMP, CD27+/CD62L+) phenotypes at the indicated  
9 timepoint against WT leukemia. **S5D:** Proportions of CAR8 with the effector memory precursor (EMP,  
10 CD27+/CD62L-) or central memory precursor (CMP, CD27+/CD62L+) phenotypes at the indicated timepoint  
11 against CD19<sup>L0</sup> leukemia. Figures S4E-L display proportions of CAR8 with the indicated phenotype at 11 days  
12 post-CAR injection against either WT (left, E,F,I,J) or CD19<sup>L0</sup> (right, G,H,K,L) leukemia. **S5E & G:** PD1+/TOX+  
13 **S5F & H:** PD1+/CD39+ **S5I & K:** TCF1+/TIM3- **S5J & L:** TCF1-/TIM3+. Data are from 2 pooled, independent  
14 experiments with n=10 mice per condition. Data represent mean +/- SD. \* p<0.05, \*\* p<0.01, \*\*\* p<0.001, \*\*\*\*  
15 p<0.0001.

**Figure S6**

**A.**

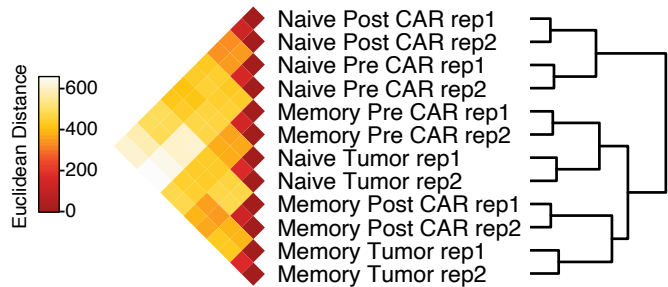

**B.**

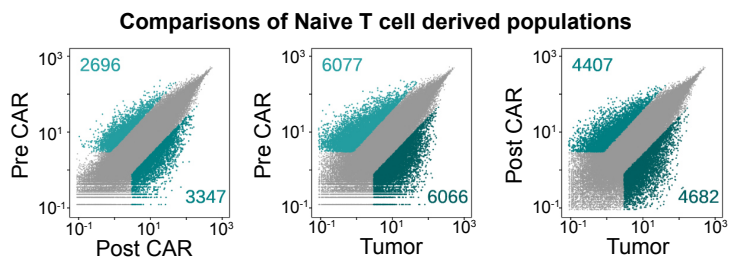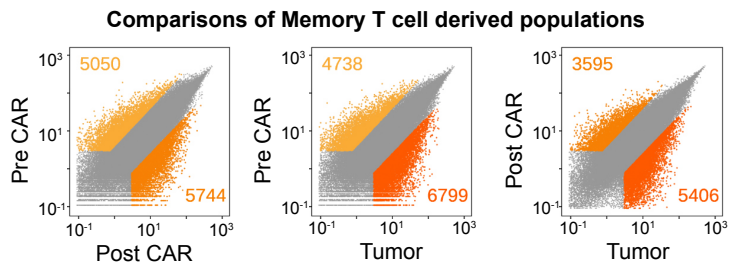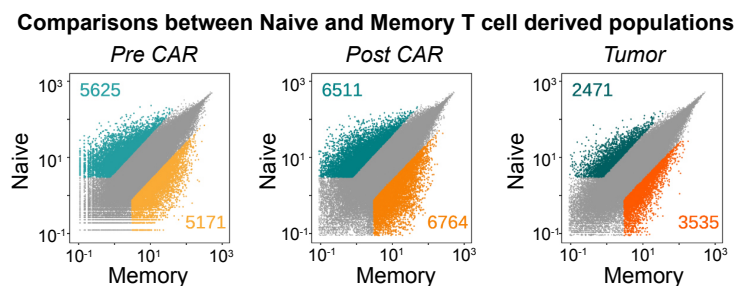

**D.**

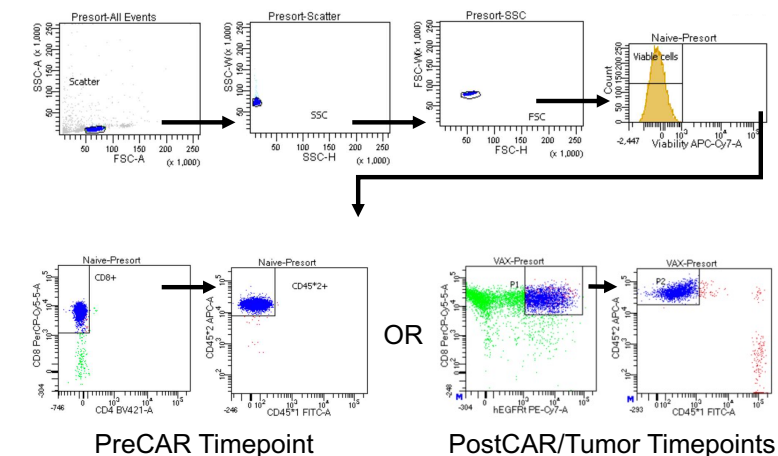

**C.**

Motif Associated ATAC-seq Signal

(ChromVAR z-score)

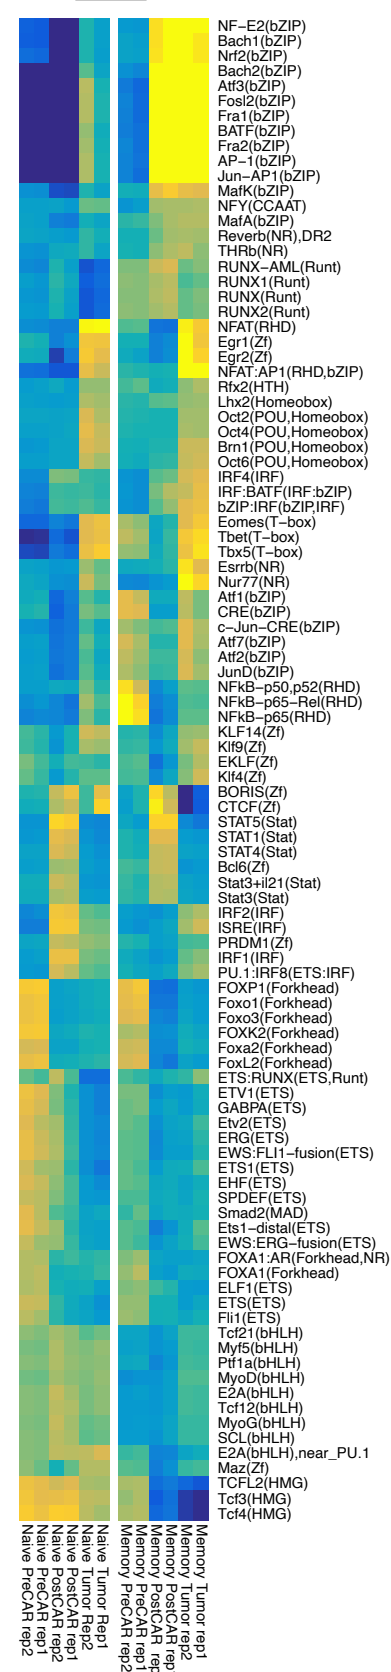

1 **Figure S6: Additional analyses of ATAC-seq data (Related to Figure 4).**

2 All analyses in this figure are from the same timeline/experimental layout described in Figure 4A. **S6A:** Inter-  
3 replicate Euclidian distance of voom-normalized ATAC-seq counts per peak between biological replicates. **S6B:**  
4 Pairwise comparisons of differentially accessible chromatin regions within conditions between different  
5 timepoints of the same condition, or between different conditions at each timepoint. Data points are mean of  
6 voom-normalized ATAC-seq counts per peak between biological replicates of each group. **S6C:** Heatmap of  
7 motif-associated ChromVAR deviation z-scores patterns of motif-associated ATAC-seq signal for indicated  
8 transcription factors. List comprises all significant differentially accessible comparisons. **S6D:** Representative  
9 gating for sorting of cells in sequencing experiments.

Figure S7

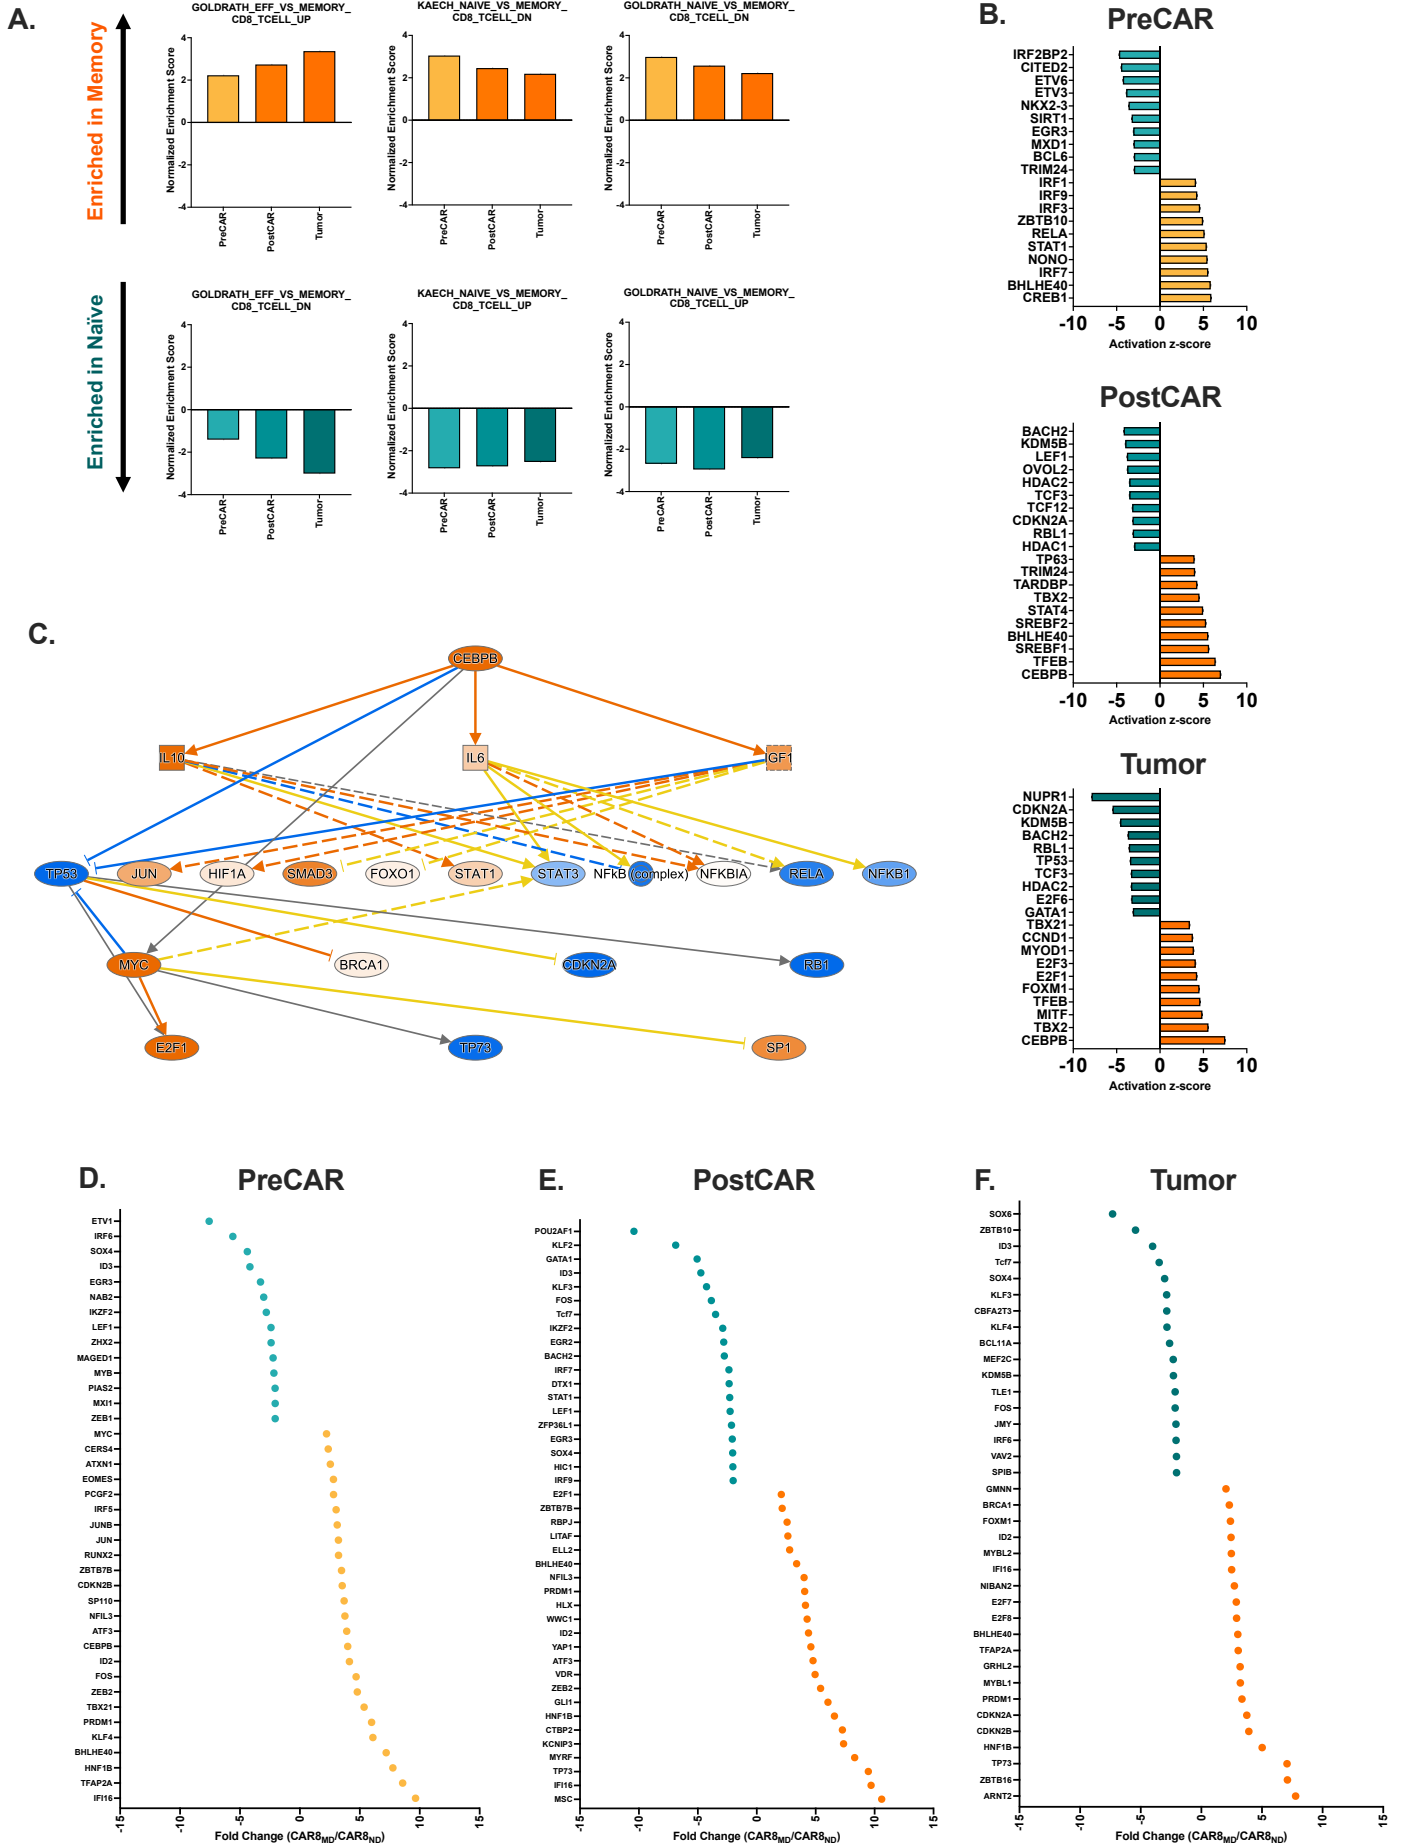

1 **Figure S7: Additional analyses of RNA-seq data (Related to Figure 5).**

2 All analyses in this figure are from the same timeline/experimental layout described in Figure 4A. **S7A:**  
3 Normalized enrichment scores from GSEA of differentially enriched genesets between indicated CD8+ T cell  
4 subsets after LCMV-armstrong acute viral infection<sup>24, 25</sup>. **S7B:** Top transcriptional activators predicted to be  
5 activated and driving differential transcriptional state between naïve versus memory-derived cells at the indicated  
6 timepoint, as predicted by Qiagen Ingenuity Pathway Analysis<sup>28</sup> (IPA). **S7C:** IPA activation map for the Cebpb  
7 transcription factor, the top predicted driver of transcriptional state in memory-derived cells at the PostCAR and  
8 Tumor timepoints. **S7D-F:** Top differentially expressed transcription factors, at the indicated timepoint. All  
9 statistics performed using DESeq2 with filtering threshold at 10, log2foldchange >2 and padj > 0.05.

**Figure S8**

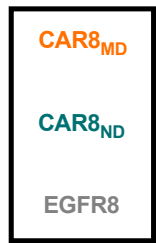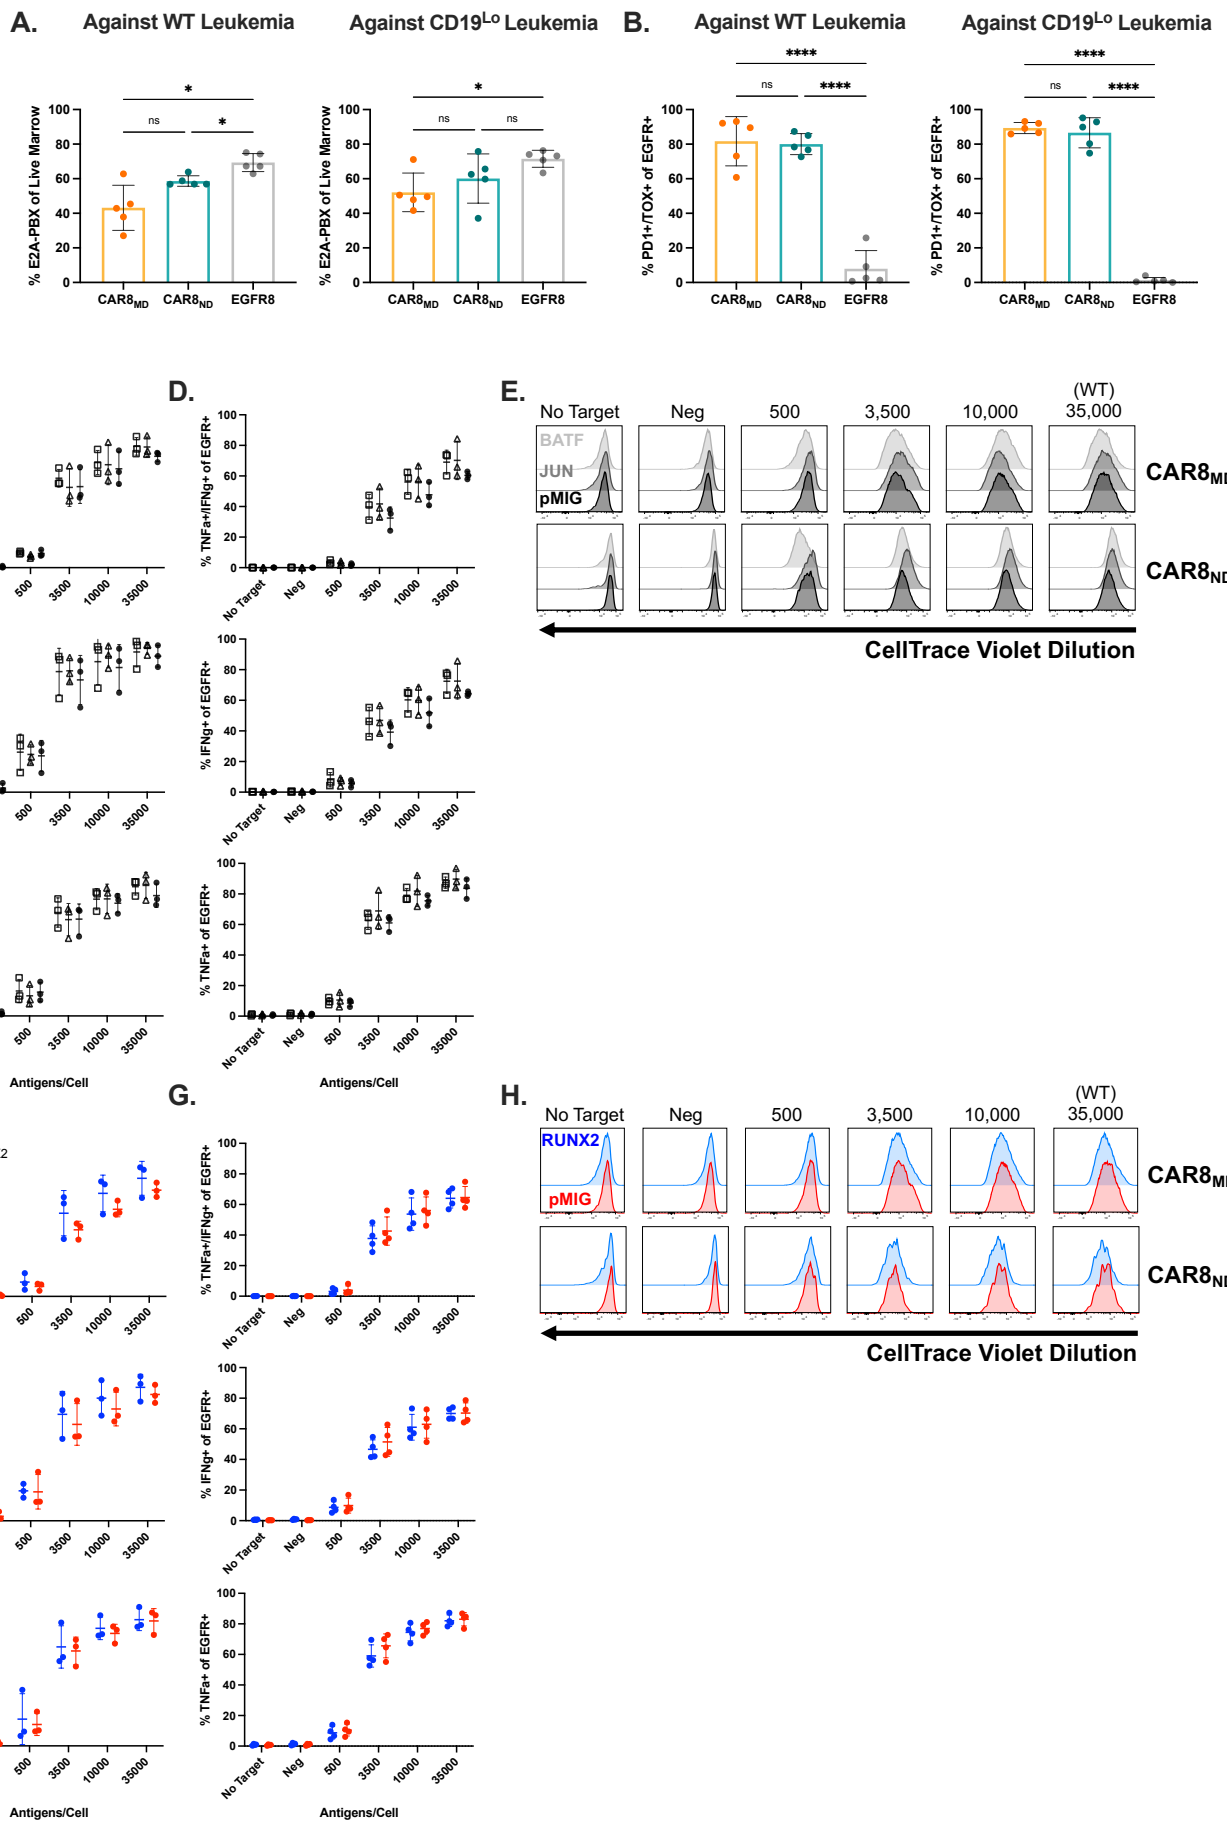

1 **Figure S8 (Related to Figure 6): Characterization of 1e5 CAR T cell dose *in vivo* experiments and *in vitro***  
2 **comparisons of BATF, JUN or RUNX2 overexpressing cells to pMIG.**

3 All analyses in this figure are the same timeline/experimental layout described in Figure 3A except with 1e5  
4 CAR+ cell dose, at 11 days post-CAR timepoint. S8A-B are characterization of the 1e5 cell dose with standard  
5 T cell groups (no ectopic transcription factor expression). **S8A:** Leukemia burden. **S8B:** Proportions of CAR8  
6 with the PD1+/TOX+ phenotype. Data in S7A-B are from 1 experiment with n=5 mice per condition. \* p<0.05, \*\*  
7 p<0.01, \*\*\* p<0.001, \*\*\*\* p<0.0001. **S8C-D:** Quantification of intracellular cytokine staining of IFN $\gamma$  and TNF $\alpha$   
8 after 6 hour co-culture assay, % positive of EGFR+, for memory (C) or naïve-derived (D) cells cotransduced with  
9 BATF, JUN or pMIG. Data in S8C-D are from 3 independent experiments. **S8E:** Proliferation as measured by  
10 dilution of CellTrace Violet dye dilution of EGFR+ cells after 72 hour co-culture assay, for memory or naïve  
11 derived cells cotransduced with BATF, JUN or pMIG. Data representative of 3 independent experiments. **S8F-**  
12 **G:** Quantification of intracellular cytokine staining of IFN $\gamma$  and TNF $\alpha$  after 6 hour co-culture assay, % positive of  
13 EGFR+, for memory (C) or naïve-derived (D) cells cotransduced with RUNX2 or pMIG. Data in S8C-D are from  
14 3-4 independent experiments. **S8H:** Proliferation as measured by dilution of CellTrace Violet dye dilution of  
15 EGFR+ cells after 72 hour co-culture assay, for memory or naïve derived cells cotransduced with RUNX2 or  
16 pMIG. Data representative of 3 independent experiments. No statistically significant differences were found  
17 between BATF, JUN or RUNX2 engineered CAR T cells and pMIG control T cells for *in vitro* data. Data represent  
18 mean +/- SD.

Figure S9

Memory-Derived

Naive-Derived

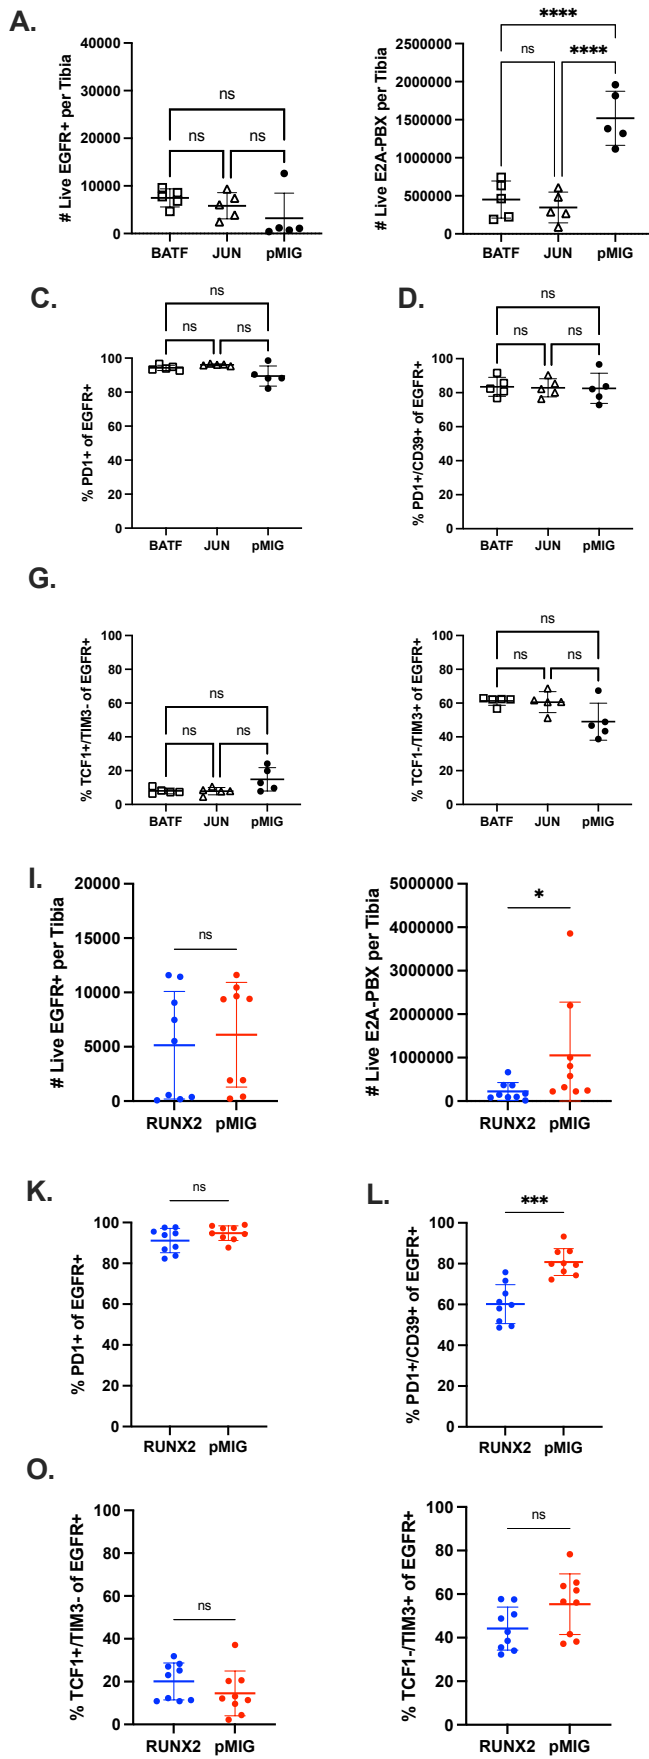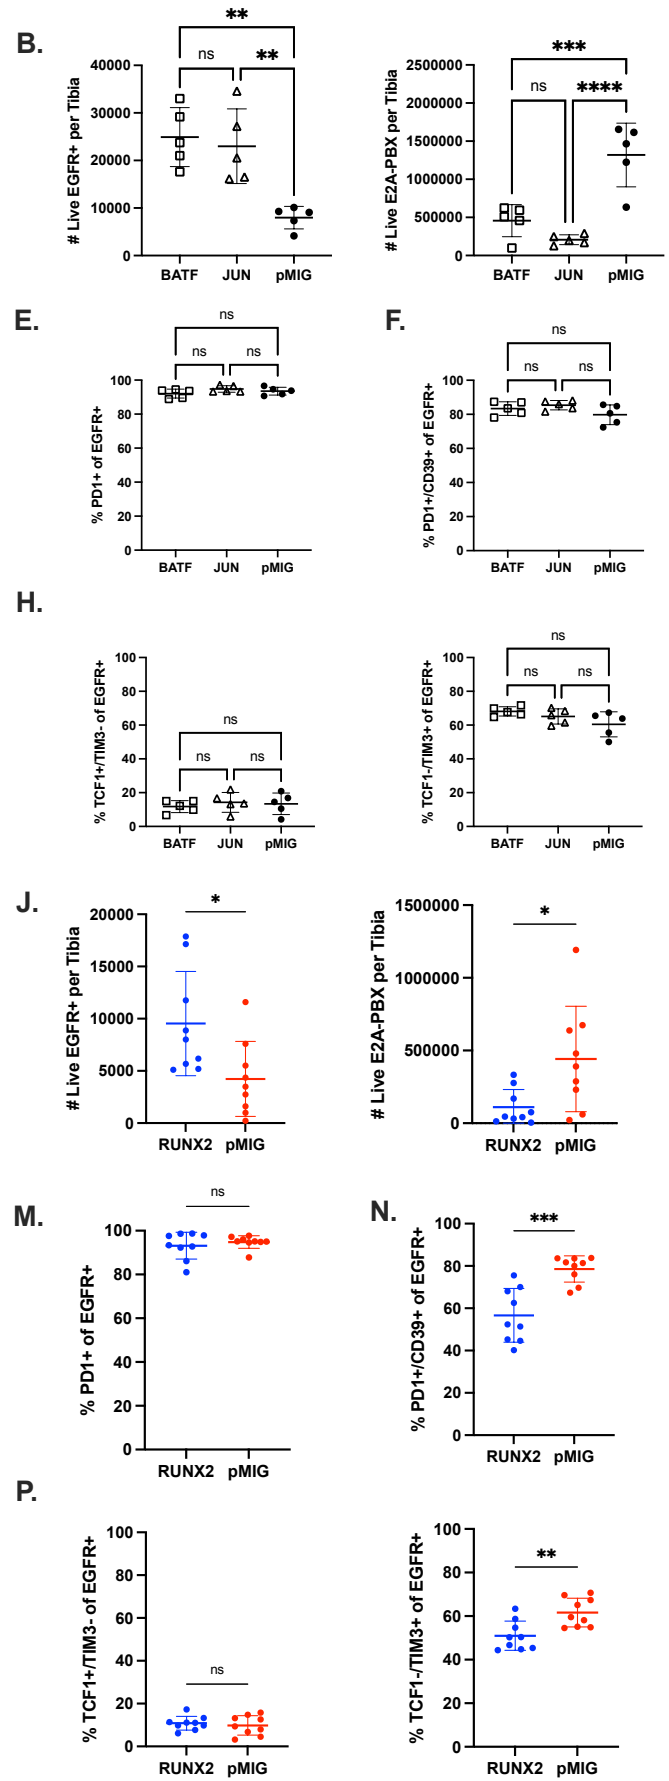



1 **Figure S9 (Related to Figure 6): Counts and additional exhaustion phenotyping data for BATF, JUN or**  
2 **RUNX2 overexpression *in vivo* experiments.**

3 All analyses in this figure are done on the same experiments described in Figure 6. Counts data was generated  
4 by flushing a single tibia and using total tibia counts and cytometer proportions data to calculate CAR and  
5 leukemia cell counts per tibia. **S9A-B:** CAR and leukemia counts for BATF or JUN overexpressing memory (A)  
6 or naïve-derived (B) CAR T cells compared to pMIG control. **S9C-H:** Proportions of EGFR+ cells from BATF,  
7 JUN or pMIG CAR8 with the indicated phenotype. S9C,D,G are memory-derived cells, S9E,F,H are naïve-  
8 derived cells. **S9C,E:** PD1+ **S9D,F:** PD1+/CD39+ **S9G-H:** Indicated TCF1/TIM3 phenotype. Data in S9A-H are  
9 from one experiment with n=5 mice per condition. **S9I-J:** CAR and leukemia counts for RUNX2 overexpressing  
10 memory (A) or naïve-derived (B) CAR T cells compared to pMIG control. **S9K-N:** Proportions of EGFR+ cells  
11 from RUNX2 or pMIG CAR8 with the indicated phenotype. S9C,D,G are memory-derived cells, S9E,F,H are  
12 naïve-derived cells. **S9K,M:** PD1+ **S9L,N:** PD1+/CD39+ **S9O,P:** Indicated TCF1/TIM3 phenotype. Data in S9I-  
13 P are from 2 pooled, independent experiments with n=9 mice per condition. Data represent mean +/- SD. \*  
14 p<0.05, \*\* p<0.01, \*\*\* p<0.001, \*\*\*\* p<0.0001.
